# Supplementary material for: Two equivalent methyl internal rotations in 2,5-dimethylthiophene investigated by microwave spectroscopy
Source: Royal Society of Chemistry journal article supplement (doi:10.1039/c5cp03513a), 2015-01-01
Supplement: c5cp03513a1.pdf [file c5cp03513a1.pdf]

## Electronic Supplementary Information

### Two equivalent methyl internal rotations in 2,5-dimethylthiophene investigated by microwave spectroscopy

*Vinh Van<sup>\*a</sup>, Wolfgang Stahl<sup>a</sup>, and Ha Vinh Lam Nguyen<sup>b</sup>*

<sup>a</sup> Institute of Physical Chemistry, RWTH Aachen University, Landoltweg 2, D-52074 Aachen, Germany.

<sup>b</sup> Laboratoire Interuniversitaire des Systèmes Atmosphériques (LISA), UMR 7583 (CNRS/ Univ. Paris Est & Paris Diderot), Université Paris Est, 61 avenue du Général de Gaulle, F-94010 Créteil cedex, France.

Corresponding author: Vinh Van

Phone: +49 241 80 94753

Email: [vinh.van@rwth-aachen.de](mailto:vinh.van@rwth-aachen.de)

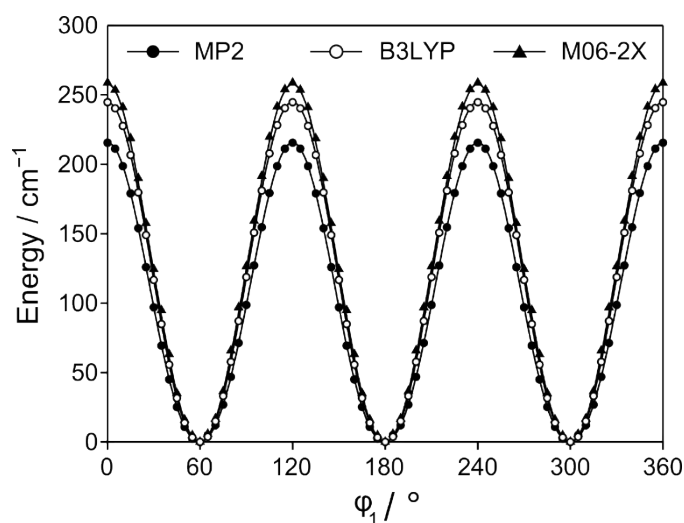

**Figure S-F1:** The potential energy curves obtained by rotating one methyl group around the C<sub>12</sub>–C<sub>10</sub> bond (for atom number see Figure 2). The dihedral angle  $\varphi_1 = \angle(\text{S}_{15}, \text{C}_{12}, \text{C}_{10}, \text{H}_4)$  was varied in a step width of 1°. The basis set cc-pVTZ was used in combination with the MP2, B3LYP, and M06-2X methods. Relative energies are given with respect to the absolute minima of  $E = -630.646179$  Hartree (MP2),  $-631.761983$  Hartree (B3LYP), and  $-631.617104$  Hartree (M06-2X).

**Table S1:** Fourier coefficients of the potential energy curves obtained by rotating one methyl group around the C<sub>12</sub>–C<sub>10</sub> bond (for atom number see Figure 2). The dihedral angle  $\varphi_1 = \angle(\text{S}_{15}, \text{C}_{12}, \text{C}_{10}, \text{H}_4)$  was varied in a step width of 1°. Calculations were performed using different methods and the cc-pVTZ basis set (see Figure S-F1). The potential is expanded as

$$V(\varphi) = a_0 + \sum_{n=3}^{15} a_n \cos(n\varphi) + \sum_{n=3}^9 b_n \sin(n\varphi).$$

|                 | MP2/ cc-pVTZ   |                  | B3LYP/cc-pVTZ  |                  | M06-2X/cc-pVTZ |                  |
|-----------------|----------------|------------------|----------------|------------------|----------------|------------------|
|                 | Hartree        | cm <sup>-1</sup> | Hartree        | cm <sup>-1</sup> | Hartree        | cm <sup>-1</sup> |
| a <sub>0</sub>  | -630.645711484 |                  | -631.761436484 |                  | -631.616516796 |                  |
| a <sub>3</sub>  | -0.000492240   | -108.0           | -0.000560540   | -123.0           | -0.000584515   | -128.3           |
| a <sub>6</sub>  | 0.000022517    | 4.9              | 0.000010775    | 2.4              | 0.000012199    | 2.7              |
| a <sub>9</sub>  | 0.000000942    | 0.2              | 0.000001992    | 0.4              | -0.000004691   | -1.0             |
| a <sub>12</sub> | 0.000000497    | 0.1              | 0.000000433    | 0.1              | 0.000000805    | 0.2              |
| a <sub>15</sub> |                |                  | 0.000000981    | 0.2              | 0.000001996    | 0.4              |

|                |             |     |             |     |              |      |
|----------------|-------------|-----|-------------|-----|--------------|------|
| b <sub>3</sub> | 0.000003408 | 0.7 | 0.000004272 | 0.9 | 0.000004708  | 1.0  |
| b <sub>6</sub> | 0.000001594 | 0.3 | 0.000000817 | 0.2 | 0.000000948  | 0.2  |
| b <sub>9</sub> |             |     |             |     | -0.000000584 | -0.1 |

**Table S2:** Cartesian nuclear coordinates of 2,5-dimethylthiophene calculated at the MP2/cc-pVTZ level of theory. The atoms are numbered according to Figure 2.

|     | a /Å      | b /Å      | c /Å      |
|-----|-----------|-----------|-----------|
| H1  | -3.310351 | -0.650870 | 0.000219  |
| H2  | -2.959398 | 0.834773  | -0.880626 |
| H3  | -2.959327 | 0.835141  | 0.880416  |
| H4  | 3.310351  | -0.650870 | -0.000175 |
| H5  | 2.959385  | 0.834781  | 0.880652  |
| H6  | 2.959341  | 0.835133  | -0.880389 |
| H7  | -1.318693 | -2.292040 | -0.000001 |
| H8  | 1.318692  | -2.292040 | -0.000015 |
| C9  | -2.697926 | 0.248923  | 0.000007  |
| C10 | 2.697926  | 0.248923  | 0.000021  |
| C11 | -1.254300 | -0.137267 | 0.000023  |
| C12 | 1.254300  | -0.137268 | -0.000015 |
| C13 | -0.708113 | -1.400395 | -0.000003 |
| C14 | 0.708112  | -1.400395 | -0.000010 |
| S15 | 0.000000  | 1.047653  | -0.000011 |

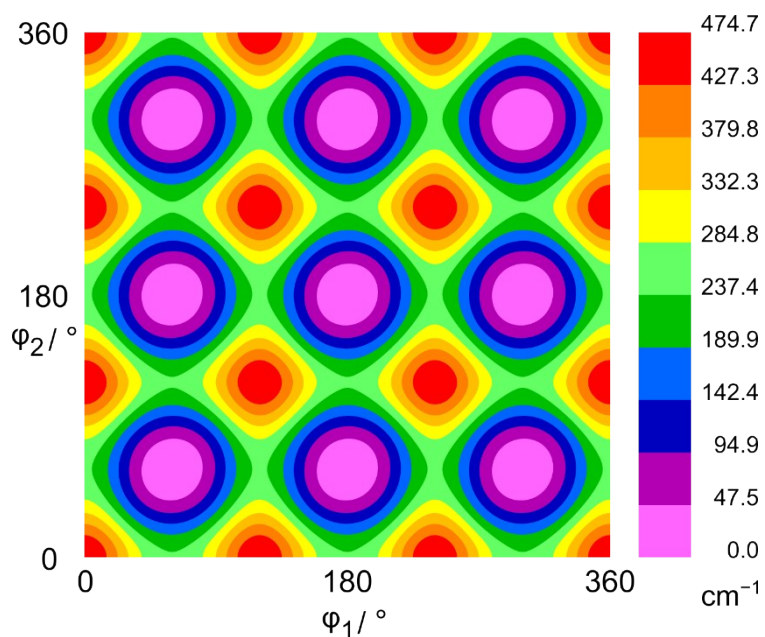

**Figure S-F2:** The potential energy surface of 2,5-dimethylthiophene calculated at the MP2/6–311++G(d,p) level of theory obtained by rotating the two methyl groups. No significant coupling was observed.

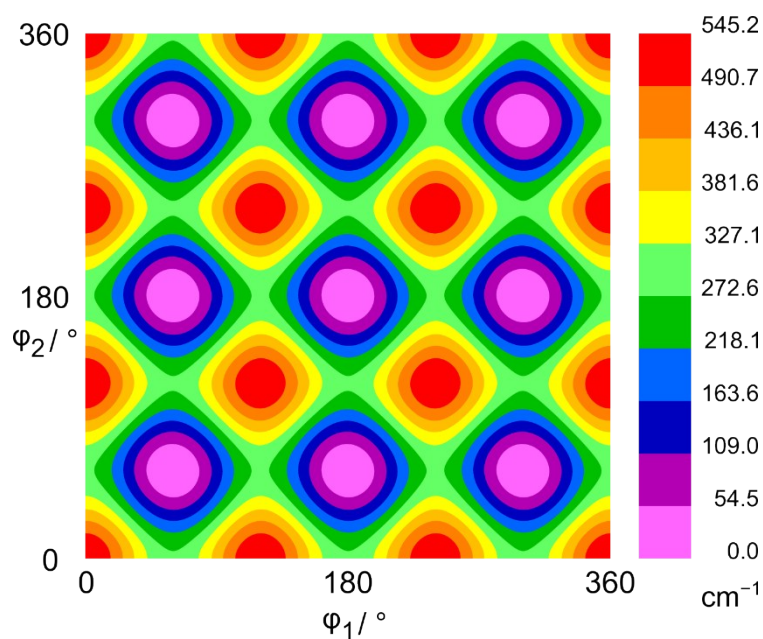

**Figure S-F3:** The potential energy surface of 2,5-dimethylthiophene calculated at the B3LYP/6–311++G(d,p) level of theory obtained by rotating the two methyl groups. No significant coupling between the torsional motions was observed.

**Table S3:** Coefficients of the two-dimensional Fourier expansion for the potential energy surface calculated at the MP2/6-311++G(d,p) and B3LYP/6-311++G(d,p) level of theory in a grid of 10° (Figure S-F2 and S-F3). Due to symmetry, only data points in the range from  $\varphi_1 = 0^\circ$  to 120° and  $\varphi_2 = 0^\circ$  to 120° are needed. The potential is expanded as  $V(\varphi_1, \varphi_2) = \sum_{n=1}^{12} V_n f_n$ .

| i  | $f_i$                                                                 | MP2/6-311++G(d,p)    | B3LYP/6-311++G(d,p)  |
|----|-----------------------------------------------------------------------|----------------------|----------------------|
|    |                                                                       | $V_i/\text{Hartree}$ | $V_i/\text{Hartree}$ |
| 1  | 1                                                                     | -630.445037756       | -631.729233044       |
| 2  | $\cos(3\varphi_1) + \sin(3\varphi_2)$                                 | 0.000006328          | 0.000005076          |
| 3  | $\cos(3\varphi_1) + \cos(3\varphi_2)$                                 | 0.000538003          | 0.000620153          |
| 4  | $\cos(6\varphi_1) + \sin(6\varphi_2)$                                 | -0.000001196         | -0.000001883         |
| 5  | $\cos(6\varphi_1) + \cos(6\varphi_2)$                                 | 0.000054143          | 0.000015548          |
| 6  | $\cos(3\varphi_1)\cos(3\varphi_2)$                                    | -0.000010439         | -0.000014867         |
| 7  | $\sin(3\varphi_1)\sin(3\varphi_2)$                                    | -0.000011985         | 0.000016431          |
| 8  | $\cos(6\varphi_1)\cos(6\varphi_2)$                                    | 0.000002005          |                      |
| 9  | $\sin(6\varphi_1)\sin(6\varphi_2)$                                    | -0.000001900         | 0.000000231          |
| 10 | $\cos(3\varphi_1)\sin(3\varphi_2) + \sin(3\varphi_1)\cos(3\varphi_2)$ | 0.000000705          | 0.000000279          |
| 11 | $\cos(6\varphi_1)\cos(3\varphi_2) + \cos(3\varphi_1)\cos(6\varphi_2)$ | 0.000001777          |                      |
| 12 | $\sin(6\varphi_1)\sin(3\varphi_2) + \sin(3\varphi_1)\sin(6\varphi_2)$ | 0.000002986          |                      |

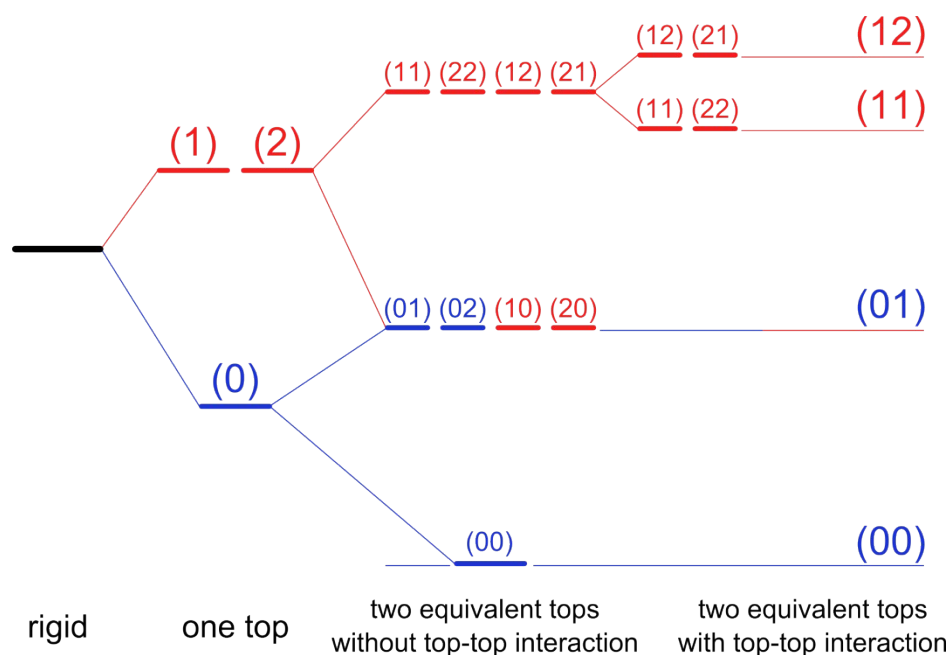

**Figure S-F4:** Schematic energy level diagram to illustrate the internal rotation splittings. Left-hand side: rigid molecule; middle: splittings to a (0) and an (1) species due to internal rotation of a methyl top; right-hand side: splittings to a (00), a doubly degenerated (01), an (11) and an (12) species due to the internal rotations of two equivalent methyl tops.

**Table S4 (next page):** The rotational constants  $A$ ,  $B$ , and  $C$  in GHz, the deviations (Dev.) between the experimental and calculated rotational constants in MHz, the angles between the internal rotor axis and the principal axes of inertia  $\angle(i,a)$ ,  $\angle(i,b)$ ,  $\angle(i,c)$  of the methyl group containing the C<sub>10</sub> atom, and the barrier to internal rotation  $V_3$  of the two equivalent methyl groups calculated using various methods and basis sets. Additionally, harmonic frequency calculations were carried out to verify the nature of the stationary points.

| Method/Basis set         | <i>A</i> | Dev. | <i>B</i> | Dev. | <i>C</i> | Dev. | $\angle(i,a)$ | $\angle(i,b)$ | $\angle(i,c)$ | $V_3/\text{cm}^{-1}$ |
|--------------------------|----------|------|----------|------|----------|------|---------------|---------------|---------------|----------------------|
| HF/6-31G(d,p)            | 5.024    | -59  | 1.742    | 5    | 1.314    | -1   | 14.89         | 75.11         | 90.00         | 382.5                |
| HF/6-31+G(d,p)           | 5.019    | -54  | 1.740    | 7    | 1.313    | 0    | 14.97         | 75.03         | 90.00         | 392.3                |
| HF/6-31++G(d,p)          | 5.019    | -54  | 1.740    | 7    | 1.313    | 0    | 14.97         | 75.03         | 90.00         | 393.5                |
| HF/6-311G(d,p)           | 5.029    | -64  | 1.743    | 4    | 1.315    | -2   | 14.95         | 75.05         | 90.00         | 380.0                |
| HF/6-311+G(d,p)          | 5.027    | -62  | 1.742    | 5    | 1.314    | -1   | 15.01         | 74.99         | 90.00         | 398.2                |
| HF/6-311++G(d,p)         | 5.027    | -62  | 1.742    | 5    | 1.314    | -1   | 15.01         | 74.99         | 90.00         | 405.2                |
| HF/6-311++G(3df,2pd)     | 5.077    | -112 | 1.751    | -4   | 1.323    | -10  | 14.93         | 75.07         | 90.00         | 366.2                |
| B3LYP/6-31G(d,p)         | 4.927    | 38   | 1.727    | 20   | 1.299    | 14   | 14.89         | 75.11         | 90.00         | 294.4                |
| B3LYP/6-31+G(d,p)        | 4.920    | 44   | 1.725    | 22   | 1.298    | 16   | 14.96         | 75.04         | 90.00         | 292.9                |
| B3LYP/6-31++G(d,p)       | 4.921    | 44   | 1.725    | 22   | 1.298    | 16   | 14.95         | 75.05         | 90.00         | 290.8                |
| B3LYP/6-311G(d,p)        | 4.940    | 25   | 1.731    | 16   | 1.302    | 11   | 14.92         | 75.08         | 90.00         | 271.0                |
| B3LYP/6-311+G(d,p)       | 4.940    | 25   | 1.730    | 17   | 1.302    | 11   | 14.98         | 75.02         | 90.00         | 275.4                |
| B3LYP/6-311++G(d,p)      | 4.940    | 25   | 1.730    | 17   | 1.302    | 11   | 14.98         | 75.02         | 90.00         | 279.1                |
| B3LYP/6-311++G(3df,2pd)  | 4.998    | -33  | 1.741    | 6    | 1.312    | 1    | 14.88         | 75.12         | 90.00         | 230.7                |
| B3LYP/cc-pVDZ            | 4.900    | 65   | 1.723    | 24   | 1.296    | 18   | 15.01         | 74.99         | 90.00         | 270.6                |
| B3LYP/cc-pVTZ            | 4.979    | -14  | 1.738    | 9    | 1.309    | 4    | 14.89         | 75.11         | 90.00         | 244.6                |
| B3LYP/cc-pVQZ            | 4.991    | -26  | 1.741    | 6    | 1.311    | 2    | 14.90         | 75.10         | 90.00         | 237.7                |
| M06-2X/6-31G(d,p)        | 4.967    | -2   | 1.745    | 1    | 1.313    | 1    | 15.06         | 74.94         | 90.00         | 298.8                |
| M06-2X/6-31+G(d,p)       | 4.961    | 4    | 1.744    | 3    | 1.311    | 2    | 15.13         | 74.87         | 89.99         | 296.1                |
| M06-2X/6-31++G(d,p)      | 4.962    | 3    | 1.744    | 3    | 1.311    | 2    | 15.12         | 74.88         | 89.99         | 295.2                |
| M06-2X/6-311G(d,p)       | 4.977    | -12  | 1.748    | -1   | 1.315    | -2   | 15.09         | 74.91         | 90.00         | 282.6                |
| M06-2X/6-311+G(d,p)      | 4.977    | -12  | 1.747    | 0    | 1.314    | -1   | 15.16         | 74.84         | 90.00         | 290.5                |
| M06-2X/6-311++G(d,p)     | 4.977    | -12  | 1.747    | 0    | 1.314    | -1   | 15.16         | 74.84         | 90.00         | 295.2                |
| M06-2X/6-311++G(3df,2pd) | 5.027    | -62  | 1.756    | -10  | 1.323    | -10  | 15.09         | 74.91         | 90.00         | 255.2                |
| M06-2X/cc-pVDZ           | 4.946    | 19   | 1.742    | 5    | 1.310    | 4    | 15.18         | 74.82         | 90.00         | 281.8                |
| M06-2X/cc-pVTZ           | 5.014    | -49  | 1.754    | -7   | 1.321    | -8   | 15.07         | 74.93         | 90.00         | 261.6                |
| M06-2X/cc-pVQZ           | 5.026    | -61  | 1.757    | -10  | 1.323    | -10  | 15.09         | 74.91         | 89.99         | 253.6                |
| MP2/6-31G(d,p)           | 4.952    | 13   | 1.746    | 1    | 1.312    | 1    | 14.72         | 75.28         | 90.00         | 247.4                |
| MP2/6-31+G(d,p)          | 4.941    | 24   | 1.744    | 3    | 1.310    | 4    | 14.85         | 75.18         | 89.17         |                      |
| MP2/6-31++G(d,p)         | 4.941    | 24   | 1.744    | 3    | 1.310    | 4    | 14.87         | 75.16         | 89.06         |                      |
| MP2/6-311G(d,p)          | 4.943    | 22   | 1.745    | 2    | 1.311    | 3    | 14.82         | 75.18         | 90.00         | 248.4                |

|                                |              |     |              |     |              |    |              |              |             |              |
|--------------------------------|--------------|-----|--------------|-----|--------------|----|--------------|--------------|-------------|--------------|
| MP2/6-311+G(d,p)               | 4.941        | 24  | 1.743        | 4   | 1.309        | 4  | 14.86        | 75.14        | 90.00       | 238.9        |
| MP2/6-311++G(d,p) <sup>a</sup> | 4.941        | 24  | 1.742        | 4   | 1.309        | 4  | 14.90        | 75.10        | 89.96       | 241.2        |
| MP2/cc-pVDZ                    | 4.877        | 88  | 1.728        | 19  | 1.297        | 17 | 15.03        | 74.97        | 90.00       | 245.2        |
| MP2/cc-pVTZ                    | 4.980        | -15 | 1.752        | -5  | 1.317        | -4 | 14.98        | 75.02        | 90.00       | 215.5        |
| MP2/cc-pVQZ                    | 5.006        | -41 | 1.758        | -11 | 1.322        | -9 | 15.03        | 74.97        | 90.00       |              |
| CCSD/6-311++G(d,p)             | 4.924        | 41  | 1.733        | 14  | 1.303        | 10 | 14.97        | 75.03        | 90.00       |              |
| CCSD/cc-pVDZ                   | 4.858        | 107 | 1.719        | 28  | 1.290        | 23 | 15.07        | 74.93        | 90.00       |              |
| CCSD(T)/cc-pVTZ <sup>b</sup>   | 4.980        | -15 | 1.752        | -5  | 1.317        | -4 | 14.98        | 75.02        | 90.00       | 275.0        |
| <b>Experiment</b>              | <b>4.965</b> |     | <b>1.747</b> |     | <b>1.313</b> |    | <b>14.59</b> | <b>75.41</b> | <b>90.0</b> | <b>248.0</b> |

---

<sup>a</sup> One imaginary frequency was obtained for the minimum structure (see text) <sup>b</sup> Single point calculations using the optimized structures calculated at the MP2/cc-pVTZ level.



**Table S5:** Observed frequencies ( $\nu_{\text{Obs.}}$ ) of the (00), (01), (11), and (12) torsional species of 2,5-dimethylthiophene.  $\nu_{\text{Obs.}} - \nu_{\text{Calc.}}$  values as obtained after a fit with the program XIAM.

| $J$ $K_a$ $K_c$ |   |   | $J$ $K_a$ $K_c$ |   |   |      | $\nu_{\text{Obs.}}$<br>GHz | $\nu_{\text{Obs.}} - \nu_{\text{Calc.}}$<br>kHz |
|-----------------|---|---|-----------------|---|---|------|----------------------------|-------------------------------------------------|
| upper level     |   |   | lower level     |   |   |      |                            |                                                 |
| 2               | 2 | 1 | 2               | 1 | 2 | (00) | 10.9765365                 | -2.3                                            |
|                 |   |   |                 |   |   | (01) | 10.7878122                 | 6.4                                             |
|                 |   |   |                 |   |   | (12) | 10.5955690                 | -1.8                                            |
|                 |   |   |                 |   |   | (11) | 10.9440246                 | -0.5                                            |
| 3               | 1 | 3 | 2               | 0 | 2 | (00) | 11.3387590                 | 1.4                                             |
|                 |   |   |                 |   |   | (01) | 11.3295459                 | 0.5                                             |
|                 |   |   |                 |   |   | (12) | 11.3126677                 | 0.3                                             |
|                 |   |   |                 |   |   | (11) | 11.3281475                 | -0.1                                            |
| 3               | 2 | 1 | 3               | 1 | 2 | (00) | 9.2541060                  | 0.6                                             |
|                 |   |   |                 |   |   | (01) | 9.3559650                  | 4.1                                             |
|                 |   |   |                 |   |   | (12) | 9.5148455                  | 0.9                                             |
|                 |   |   |                 |   |   | (11) | 9.2224300                  | 0.0                                             |
| 3               | 2 | 2 | 2               | 1 | 1 | (00) | 18.8568018                 | -6.8                                            |
|                 |   |   |                 |   |   | (01) | 18.7112833                 | 1.6                                             |
|                 |   |   |                 |   |   | (12) | 18.4867022                 | -0.3                                            |
|                 |   |   |                 |   |   | (11) | 18.8240931                 | 0.2                                             |
| 3               | 2 | 2 | 3               | 1 | 3 | (00) | 11.6513380                 | 2.3                                             |
|                 |   |   |                 |   |   | (01) | 11.5173545                 | 3.2                                             |
|                 |   |   |                 |   |   | (12) | 11.3265087                 | -1.3                                            |
|                 |   |   |                 |   |   | (11) | 11.6187890                 | -0.4                                            |
| 4               | 0 | 4 | 3               | 1 | 3 | (00) | 9.5343173                  | -0.2                                            |
|                 |   |   |                 |   |   | (01) | 9.5423794                  | -0.1                                            |
|                 |   |   |                 |   |   | (12) | 9.5579888                  | 0.3                                             |
|                 |   |   |                 |   |   | (11) | 9.5427464                  | -0.1                                            |
| 4               | 1 | 4 | 3               | 0 | 3 | (00) | 13.6180181                 | -0.2                                            |
|                 |   |   |                 |   |   | (01) | 13.6105325                 | 0.3                                             |
|                 |   |   |                 |   |   | (12) | 13.5983489                 | 0.2                                             |
|                 |   |   |                 |   |   | (11) | 13.6078216                 | 0.3                                             |
| 4               | 2 | 2 | 4               | 1 | 3 | (00) | 8.8326193                  | -4.4                                            |
|                 |   |   |                 |   |   | (01) | 8.8742012                  | -2.6                                            |
|                 |   |   |                 |   |   | (12) | 8.9877496                  | 0.2                                             |
|                 |   |   |                 |   |   | (11) | 8.8024198                  | 0.1                                             |
| 4               | 2 | 3 | 4               | 1 | 4 | (00) | 12.5615812                 | 1.1                                             |
|                 |   |   |                 |   |   | (01) | 12.4886107                 | 2.7                                             |
|                 |   |   |                 |   |   | (12) | 12.3438966                 | -0.4                                            |
|                 |   |   |                 |   |   | (11) | 12.5289805                 | -0.1                                            |
| 4               | 3 | 1 | 3               | 2 | 2 | (11) | 29.5137418                 | 0.3                                             |
| 4               | 3 | 1 | 4               | 2 | 2 | (00) | 16.7680988                 | -10.1                                           |
|                 |   |   |                 |   |   | (01) | 16.9710250                 | 6.1                                             |
|                 |   |   |                 |   |   | (12) | 17.1047684                 | 0.0                                             |
|                 |   |   |                 |   |   | (11) | 16.7130308                 | -0.3                                            |

|   |   |   |   |   |   |      |            |                    |
|---|---|---|---|---|---|------|------------|--------------------|
| 4 | 3 | 2 | 3 | 2 | 1 | (00) | 29.3489770 | 2.1                |
|   |   |   |   |   |   | (11) | 29.2943697 | -0.1               |
| 4 | 3 | 2 | 4 | 2 | 3 | (00) | 17.3413095 | 0.7                |
|   |   |   |   |   |   | (01) | 17.0838880 | -5.8               |
|   |   |   |   |   |   | (12) | 16.8956150 | -0.9               |
|   |   |   |   |   |   | (11) | 17.2877417 | 0.3                |
| 4 | 4 | 0 | 3 | 3 | 0 | (12) | 36.4610260 | -1.0               |
| 4 | 4 | 0 | 3 | 3 | 1 | (11) | 36.2672629 | -0.1               |
| 4 | 4 | 1 | 3 | 3 | 0 | (00) | 36.3402495 | 3.7                |
|   |   |   |   |   |   | (11) | 36.2647106 | -1.1               |
| 4 | 4 | 1 | 3 | 3 | 1 | (00) | 36.3427845 | 121.4 <sup>a</sup> |
|   |   |   |   |   |   | (01) | 36.2059699 | 1.5                |
|   |   |   |   |   |   | (12) | 36.0707866 | 0.8                |
| 5 | 0 | 5 | 4 | 1 | 4 | (00) | 12.8104635 | -0.2               |
|   |   |   |   |   |   | (01) | 12.8161123 | -0.3               |
|   |   |   |   |   |   | (12) | 12.8261327 | 0.2                |
|   |   |   |   |   |   | (11) | 12.8173160 | 0.0                |
| 5 | 1 | 5 | 4 | 0 | 4 | (00) | 15.8274913 | 0.3                |
|   |   |   |   |   |   | (01) | 15.8211763 | 0.3                |
|   |   |   |   |   |   | (12) | 15.8117354 | 0.0                |
|   |   |   |   |   |   | (11) | 15.8180447 | 0.3                |
| 5 | 2 | 3 | 5 | 1 | 4 | (00) | 8.5883523  | 0.6                |
|   |   |   |   |   |   | (01) | 8.6002029  | -0.2               |
|   |   |   |   |   |   | (12) | 8.6573483  | -0.2               |
|   |   |   |   |   |   | (11) | 8.5606005  | 0.0                |
| 5 | 2 | 4 | 5 | 1 | 5 | (00) | 13.7100406 | 0.2                |
|   |   |   |   |   |   | (01) | 13.6680106 | -2.1               |
|   |   |   |   |   |   | (12) | 13.5809972 | 0.1                |
|   |   |   |   |   |   | (11) | 13.6773378 | 0.0                |
| 5 | 3 | 2 | 5 | 2 | 3 | (00) | 16.3000706 | 1.1                |
|   |   |   |   |   |   | (01) | 16.5097668 | 3.6                |
|   |   |   |   |   |   | (12) | 16.7006530 | -2.1               |
|   |   |   |   |   |   | (11) | 16.2441595 | 0.6                |
| 5 | 3 | 3 | 5 | 2 | 4 | (00) | 17.5487510 | 1.0                |
|   |   |   |   |   |   | (01) | 17.2843342 | 1.1                |
|   |   |   |   |   |   | (12) | 17.0385646 | 0.9                |
|   |   |   |   |   |   | (11) | 17.4957106 | -0.8               |
| 5 | 4 | 1 | 4 | 3 | 1 | (01) | 39.4707114 | -1.7               |
|   |   |   |   |   |   | (12) | 39.5305356 | -1.4               |
| 5 | 4 | 1 | 4 | 3 | 2 | (00) | 39.4198024 | -1.5               |
|   |   |   |   |   |   | (11) | 39.3442656 | -0.3               |
| 5 | 4 | 2 | 4 | 3 | 1 | (00) | 39.4019011 | -2.3               |
|   |   |   |   |   |   | (11) | 39.3262585 | 1.4                |
| 5 | 4 | 2 | 4 | 3 | 2 | (01) | 39.2752427 | 1.2                |
|   |   |   |   |   |   | (12) | 39.1398133 | -0.9               |

---

|   |   |   |   |   |   |      |            |      |
|---|---|---|---|---|---|------|------------|------|
| 6 | 0 | 6 | 5 | 1 | 5 | (00) | 15.9609636 | -0.3 |
|   |   |   |   |   |   | (01) | 15.9648206 | -0.7 |
|   |   |   |   |   |   | (12) | 15.9713286 | 0.2  |
|   |   |   |   |   |   | (11) | 15.9659788 | 0.4  |
| 6 | 1 | 5 | 5 | 2 | 4 | (00) | 11.9941358 | -0.2 |
|   |   |   |   |   |   | (01) | 12.0369669 | 0.9  |
|   |   |   |   |   |   | (12) | 12.1303855 | 0.5  |
|   |   |   |   |   |   | (11) | 12.0228012 | -0.5 |
| 6 | 1 | 5 | 6 | 0 | 6 | (00) | 9.7432119  | -0.6 |
|   |   |   |   |   |   | (01) | 9.7401571  | -0.3 |
|   |   |   |   |   |   | (11) | 9.7341613  | 0.2  |
| 6 | 1 | 6 | 5 | 0 | 5 | (00) | 18.0476297 | -0.3 |
|   |   |   |   |   |   | (01) | 18.0423861 | 0.2  |
|   |   |   |   |   |   | (12) | 18.0350255 | 0.3  |
|   |   |   |   |   |   | (11) | 18.0393073 | 1.0  |
| 6 | 2 | 4 | 6 | 1 | 5 | (00) | 8.6453315  | -0.4 |
|   |   |   |   |   |   | (01) | 8.6459070  | 0.0  |
|   |   |   |   |   |   | (12) | 8.6710172  | -0.4 |
|   |   |   |   |   |   | (11) | 8.6209081  | 0.3  |
| 6 | 2 | 5 | 6 | 1 | 6 | (00) | 15.0938338 | -0.8 |
|   |   |   |   |   |   | (01) | 15.0647072 | -0.6 |
|   |   |   |   |   |   | (12) | 15.0114780 | 0.2  |
|   |   |   |   |   |   | (11) | 15.0609230 | -0.2 |
| 6 | 3 | 3 | 6 | 2 | 4 | (00) | 15.6310127 | 1.1  |
|   |   |   |   |   |   | (01) | 15.8006644 | 1.0  |
|   |   |   |   |   |   | (12) | 16.0169060 | -1.8 |
|   |   |   |   |   |   | (11) | 15.5746017 | 1.2  |
| 6 | 3 | 4 | 6 | 2 | 5 | (00) | 17.8945907 | 1.3  |
|   |   |   |   |   |   | (01) | 17.6703043 | 1.4  |
|   |   |   |   |   |   | (11) | 17.8423639 | -0.2 |
| 7 | 0 | 7 | 6 | 1 | 6 | (00) | 18.9719345 | 0.1  |
|   |   |   |   |   |   | (01) | 18.9743628 | 0.5  |
|   |   |   |   |   |   | (12) | 18.9784023 | 0.3  |
|   |   |   |   |   |   | (11) | 18.9751414 | -0.6 |
| 7 | 1 | 6 | 6 | 2 | 5 | (00) | 16.0695913 | 0.3  |
|   |   |   |   |   |   | (01) | 16.0975961 | -0.9 |
|   |   |   |   |   |   | (11) | 16.0959109 | 0.0  |
| 7 | 1 | 6 | 7 | 0 | 7 | (00) | 12.1914914 | 0.3  |
|   |   |   |   |   |   | (01) | 12.1879419 | -0.7 |
|   |   |   |   |   |   | (12) | 12.1871051 | 1.3  |
|   |   |   |   |   |   | (11) | 12.1816922 | 0.1  |
| 7 | 1 | 7 | 6 | 0 | 6 | (00) | 20.3353917 | 0.2  |
|   |   |   |   |   |   | (01) | 20.3311854 | -0.2 |
|   |   |   |   |   |   | (12) | 20.3255799 | -0.6 |
|   |   |   |   |   |   | (11) | 20.3284180 | -1.1 |

---

|   |   |   |   |   |   |      |            |      |
|---|---|---|---|---|---|------|------------|------|
| 7 | 2 | 5 | 7 | 1 | 6 | (00) | 9.1018196  | 0.0  |
|   |   |   |   |   |   | (01) | 9.0986020  | 0.2  |
|   |   |   |   |   |   | (12) | 9.1092128  | -0.3 |
|   |   |   |   |   |   | (11) | 9.0813360  | 0.9  |
| 7 | 2 | 6 | 6 | 1 | 5 | (00) | 27.2946495 | -1.9 |
|   |   |   |   |   |   | (01) | 27.2700520 | 0.9  |
|   |   |   |   |   |   | (12) | 27.2279202 | 1.5  |
|   |   |   |   |   |   | (11) | 27.2634222 | -1.5 |
| 7 | 2 | 6 | 7 | 1 | 7 | (00) | 16.7024726 | 0.2  |
|   |   |   |   |   |   | (01) | 16.6790225 | -0.3 |
|   |   |   |   |   |   | (12) | 16.6423931 | 1.3  |
|   |   |   |   |   |   | (11) | 16.6691639 | -1.8 |
| 7 | 3 | 4 | 7 | 2 | 5 | (00) | 14.8294534 | 0.0  |
|   |   |   |   |   |   | (01) | 14.9308278 | -1.3 |
|   |   |   |   |   |   | (11) | 14.7736285 | -0.1 |
| 7 | 3 | 5 | 6 | 2 | 4 | (00) | 37.0634786 | 1.3  |
|   |   |   |   |   |   | (01) | 36.8830885 | 1.5  |
| 7 | 3 | 5 | 7 | 2 | 6 | (00) | 18.4141567 | -1.0 |
|   |   |   |   |   |   | (01) | 18.2589415 | -1.5 |
|   |   |   |   |   |   | (11) | 18.3630346 | 0.7  |
| 7 | 5 | 2 | 7 | 4 | 3 | (00) | 30.7867789 | 2.3  |
|   |   |   |   |   |   | (01) | 30.8452546 | 1.3  |
|   |   |   |   |   |   | (12) | 30.8942989 | 0.8  |
|   |   |   |   |   |   | (11) | 30.6900419 | -2.3 |
| 7 | 5 | 3 | 7 | 4 | 4 | (00) | 30.8056399 | -2.2 |
|   |   |   |   |   |   | (12) | 30.5045854 | -0.5 |
|   |   |   |   |   |   | (11) | 30.7090747 | 1.4  |

<sup>a</sup> Not included in the fit

**Table S6:** Comparison of the fits using Watson's A and Watson's S reduction in I' representation using the program XIAM. The centrifugal distortion constants calculated at the MP2/6-311++G(d,p) level of theory are in reasonable agreement with the experimental values in both cases.

**a) Watson's A reduction**

| Par. <sup>a</sup> | Unit             | Fit I          | Fit II                   | Calc.  |
|-------------------|------------------|----------------|--------------------------|--------|
| <i>A</i>          | GHz              | 4.97224360(42) | 4.96500697(89)           | 4.9414 |
|                   | )                |                |                          | 4      |
| <i>B</i>          | GHz              | 1.74696506(27) | 1.74694756(13)           | 1.7426 |
|                   | )                |                |                          | 6      |
| <i>C</i>          | GHz              | 1.31337981(20) | 1.313336623(81)          | 1.3094 |
|                   | )                |                | )                        | 4      |
| $\Delta_J$        | kHz              | 0.0684(28)     | 0.0672(11)               | 0.0630 |
| $\Delta_{JK}$     | kHz              | 0.2071(93)     | 0.1579(37)               | 0.171  |
| $\Delta_K$        | kHz              | 3.2158(98)     | 0.9161(43)               | 0.803  |
| $\delta_J$        | kHz              | 0.0196(14)     | 0.01839(51)              | 0.0171 |
|                   |                  |                |                          | 1      |
| $\delta_K$        | kHz              | 0.136(23)      | 0.1031(89)               | 0.0390 |
|                   |                  |                |                          | 0      |
| $V_3$             | cm <sup>-1</sup> |                | 247.95594(30)            | 241.2  |
| $I_\alpha$        | uÅ <sup>2</sup>  |                | 3.16442(39)              |        |
| $\angle(i,a)$     | °                |                | 14.5931(78) <sup>b</sup> | 14.90  |
| $\angle(i,b)$     | °                |                | 75.4069(78)              | 75.10  |
| $\angle(i,c)$     | °                |                | 90.00(fixed)             | 89.96  |
| $F_{12}$          | GHz              |                | -7.320(12)               |        |
| $D_{\text{pi}2J}$ | kHz              |                | -2.78(25)                |        |
| $D_{\text{pi}2K}$ | kHz              |                | -98.9(42)                |        |
| $D_{\text{pi}2-}$ | kHz              |                | 1.97(19)                 |        |
| $\sigma^c$        | kHz              | 2.6            | 1.9                      |        |
| $N^d$             |                  | 41             | 157                      |        |
| $B_-$             | 1.000            |                |                          |        |
| $B_K$             | -0.135           | 1.000          |                          |        |

**Fit I:**  
Correlation matrix of fitted linear combinations as given in the XIAM output.

|               |        |        |        |        |        |        |       |       |
|---------------|--------|--------|--------|--------|--------|--------|-------|-------|
| $B_J$         | 0.293  | -0.375 | 1.000  |        |        |        |       |       |
| $\Delta_J$    | 0.441  | -0.377 | 0.909  | 1.000  |        |        |       |       |
| $\Delta_K$    | 0.237  | -0.096 | 0.265  | 0.350  | 1.000  |        |       |       |
| $\Delta_{JK}$ | -0.332 | 0.756  | -0.390 | -0.524 | -0.635 | 1.000  |       |       |
| $\delta_J$    | 0.942  | -0.154 | 0.296  | 0.391  | 0.220  | -0.285 | 1.000 |       |
| $\delta_K$    | 0.430  | 0.003  | 0.096  | 0.381  | 0.192  | -0.321 | 0.185 | 1.000 |

Strongest correlation between  $\delta_J$  and  $B_-$  (0.9422)

**b) Watson's S reduction**

| Par. <sup>a</sup> | Unit             | Fit I          | Fit II                   | MP2/6-311++G(d,p) |
|-------------------|------------------|----------------|--------------------------|-------------------|
| <i>A</i>          | GHz              | 4.97224362(42) | 4.96500700(89)           | 4.9414            |
|                   | )                |                |                          |                   |
| <i>B</i>          | GHz              | 1.74696478(26) | 1.74694735(13)           | 1.7426            |
|                   | )                |                |                          |                   |
| <i>C</i>          | GHz              | 1.31338008(20) | 1.313336823(81)          | 1.3094            |
|                   | )                |                | )                        |                   |
| $D_J$             | kHz              | 0.0642(26)     | 0.06390(97)              | 0.0618            |
| $D_{JK}$          | kHz              | 0.2328(89)     | 0.1774(35)               | 0.178             |
| $D_K$             | kHz              | 3.1944(97)     | 0.8998(43)               | 0.797             |
| $d_1$             | kHz              | -0.0196(14)    | -0.01839(51)             | -0.0171           |
| $d_2$             | kHz              | -0.00214(23)   | -0.00163(14)             | -0.000619         |
| $V_3$             | cm <sup>-1</sup> |                | 247.95610(30)            | 241.2             |
|                   | )                |                |                          |                   |
| $I_\alpha$        | uÅ <sup>2</sup>  |                | 3.16442(39)              |                   |
| $\angle(i,a)$     | °                |                | 14.5931(78) <sup>b</sup> | 14.90             |
| $\angle(i,b)$     | °                |                | 75.4069(78)              | 75.10             |
| $\angle(i,c)$     | °                |                | 90.00(fixed)             | 89.96             |
| $F_{12}$          | GHz              |                | -7.320(12)               |                   |
| $D_{\text{pi}2J}$ | kHz              |                | -2.77(25)                |                   |
| $D_{\text{pi}2K}$ | kHz              |                | -99.0(42)                |                   |
| $D_{\text{pi}2-}$ | kHz              |                | 1.97(19)                 |                   |

$\sigma^c$  kHz 2.6 1.9  
 $N^d$  41 157

**Fit I:** Correlation matrix of fitted linear combinations as given in the XIAM output.

$B_-$  1.000  
 $B_K$  -0.148 1.000

**Fit II, Watson's A:** Correlation matrix of fitted linear combinations as given in the XIAM output.

$B_-$  1  
 $B_K$  -0.078 1  
 $B_J$  0.456 -0.048 1  
 $\Delta_J$  0.385 0.029 0.75 1  
 $\Delta_K$  0.231 0.411 0.267 0.342 1  
 $\Delta_{JK}$  -0.287 0.015 -0.310 -0.501 -0.624 1  
 $\delta_J$  0.793 0.082 0.299 0.433 0.24 -0.275 1  
 $\delta_K$  0.222 0.169 -0.025 0.376 0.195 -0.309 0.181 1  
 $V_{1n}$  0.142 0.896 0.173 0.061 0.462 -0.101 0.102 0.056 1  
delta -0.477 0.137 -0.415 0.031 -0.107 0.041 -0.006 0.251 -0.294 1  
 $F_0$  0.098 0.932 0.136 0.066 0.463 -0.099 0.104 0.083 0.995 -0.201 1  
 $F_{12}$  0.009 0.066 -0.015 0.072 -0.004 -0.019 0.048 0.122 0.039 0.043 0.043 1  
 $D_{pi2K}$  0.066 -0.992 0.012 -0.077 -0.426 0.081 -0.101 -0.172 -0.903 -0.140 -0.939 -0.065 1  
 $D_{pi2J}$  -0.415 0.051 -0.599 -0.041 -0.101 0.013 -0.061 0.172 -0.268 0.719 -0.203 0.062 -0.055 1  
 $D_{pi2-}$  -0.539 0.034 -0.410 0.007 -0.151 0.063 -0.014 0.194 -0.345 0.878 -0.265 0.068 -0.035 0.702 1

strongest correlation between  $F_0$  and  $V_{1n}$  (0.9953)

**Fit II, Watson's S:** Correlation matrix of fitted linear combinations as given in the XIAM output.

$B_-$  1  
 $B_K$  -0.128 1  
 $B_J$  0.475 -0.048 1  
 $D_J$  0.325 -0.017 0.81 1  
 $D_{JK}$  0.202 0.359 0.279 0.277 1  
 $D_K$  -0.241 0.097 -0.334 -0.410 -0.612 1  
 $d_I$  -0.759 -0.083 -0.297 -0.411 -0.183 0.198 1  
 $d_2$  0.057 -0.171 0.032 -0.113 0.133 -0.161 0.182 1  
 $V_{1n}$  0.13 0.895 0.174 0.049 0.449 -0.078 -0.102 -0.056 1  
delta -0.560 0.137 -0.418 -0.040 -0.191 0.163 0.006 -0.251 -0.296 1  
 $F_0$  0.078 0.932 0.136 0.047 0.441 -0.063 -0.104 -0.083 0.995 -0.202 1  
 $F_{12}$  -0.026 0.066 -0.015 0.042 -0.044 0.039 -0.048 -0.122 0.039 0.042 0.043 1  
 $D_{pi2K}$  0.116 -0.992 0.013 -0.033 -0.374 0.001 0.101 0.172 -0.902 -0.139 -0.939 -0.065 1

$B_J$  0.288 -0.374 1.000  
 $D_J$  0.343 -0.403 0.948 1.000  
 $D_{JK}$  0.149 -0.101 0.232 0.276 1.000  
 $D_K$  -0.205 0.793 -0.362 -0.431 -0.626 1.000  
 $d_I$  -0.971 0.151 -0.294 -0.368 -0.153 0.209 1.000  
 $d_2$  -0.122 -0.019 -0.089 -0.129 0.174 -0.144 0.185 1.000  
Strongest correlation between  $d_I$  and  $B_-$  (-0.9711)

|            |        |       |        |        |        |       |       |        |        |       |        |       |        |       |
|------------|--------|-------|--------|--------|--------|-------|-------|--------|--------|-------|--------|-------|--------|-------|
| $D_{pi2J}$ | -0.474 | 0.051 | -0.600 | -0.093 | -0.160 | 0.097 | 0.06  | -0.173 | -0.269 | 0.72  | -0.203 | 0.062 | -0.055 | 1     |
| $D_{pi2-}$ | -0.607 | 0.034 | -0.411 | -0.048 | -0.217 | 0.159 | 0.014 | -0.194 | -0.346 | 0.878 | -0.266 | 0.068 | -0.034 | 0.703 |

strongest correlation between  $F_0$  and  $V_{1n}$  ( 0.9953)
